# Supplementary material for: Lower Blood Vitamin D Levels Are Associated with Depressive Symptoms in a Population of Older Adults in Kuwait: A Cross-Sectional Study
Source: MDPI journal article supplement (doi:10.3390/nu14081548), 2022-04-08
Supplement: s1 [file s1]

# Lower blood vitamin D levels are associated with Depressive Symptoms in an Elderly Population in Kuwait: A Cross-sectional Study

## Supplementary Material

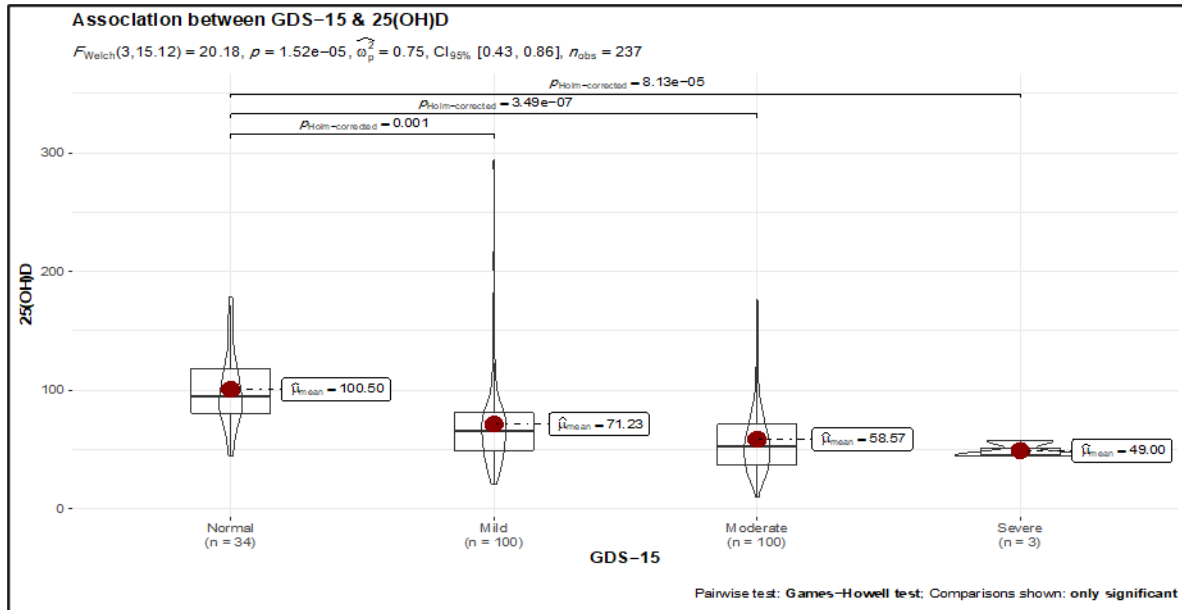

**Supplementary Figure S1.** Association between GDS-15 and 25(OH)D. Welch's test was statistically significant ( $F_{\text{Welch}}(3, 15.12) = 20.18, p < 0.001, E(\omega_p^2) = 0.75, \text{C.I. [0.43, 0.86]}$ ) indicating an association between GDS15 and 25-OH-D levels. Post-hoc pairwise comparisons showed that the average 25-OH-D levels were significantly higher in participants with no depression symptoms than participants with mild, moderate, and severe depressive symptoms ( $p < 0.001$  for all pairwise comparisons).

# Association between GDS-15 & 25(OH)D grouped by Gender level

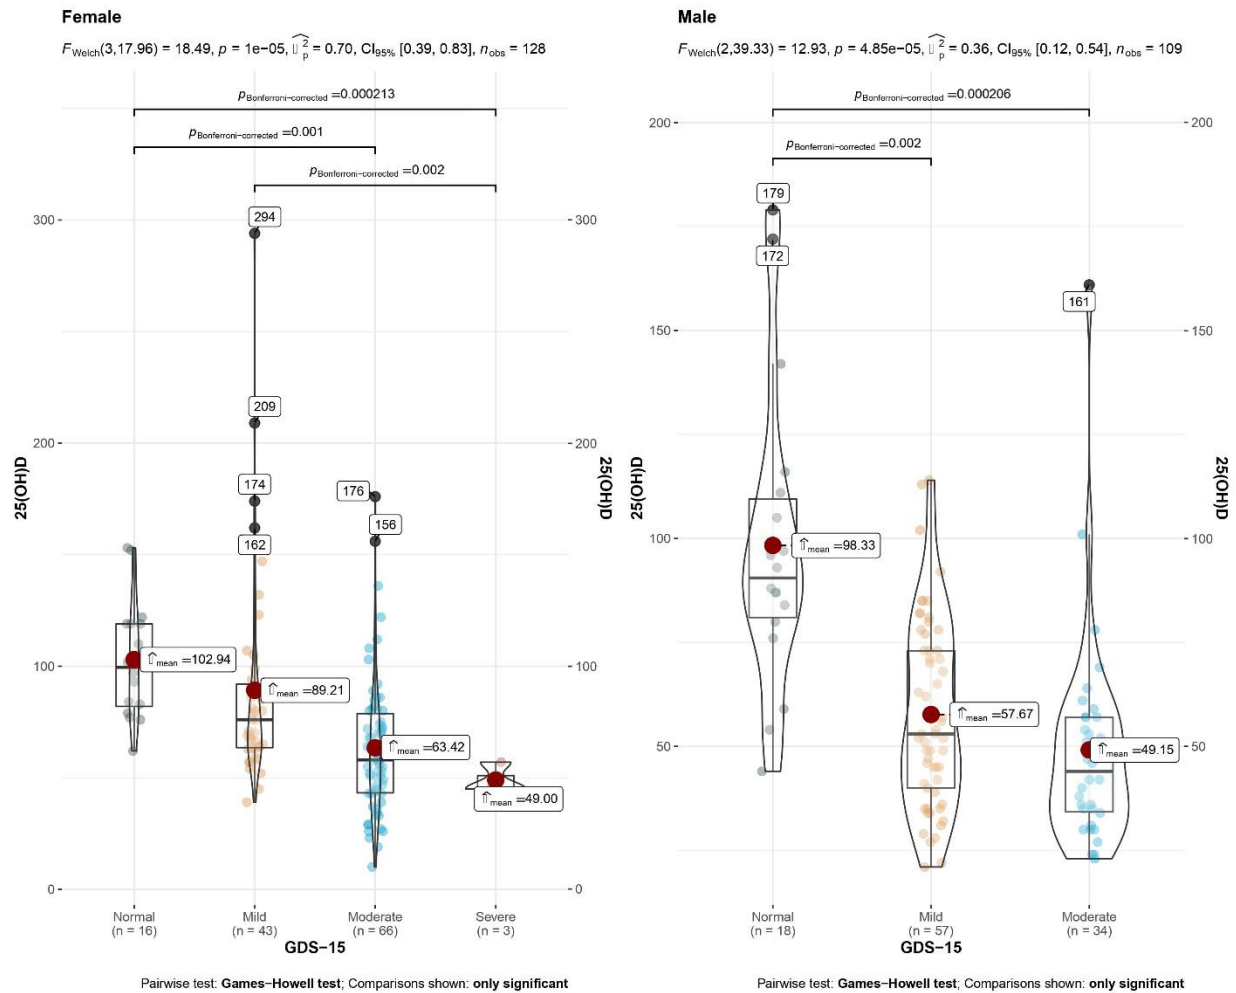

**Supplementary Figure S2.** Association between GDS-15 and 25-OH-D grouped by gender. When the analysis was stratified by gender, a statistically significant association was observed between GDS-15 and 25-OH-D levels in females ( $F_{\text{Welch}}(3, 17.96) = 18.49, p < 0.001, E(\omega_p^2) = 0.70, \text{C.I.} [0.39, 0.83]$ ) and males ( $F_{\text{Welch}}(2, 39.33) = 12.93, p < 0.001, \hat{\omega}_p^2 = 0.36, \text{C.I.} [0.12, 0.54]$ ). Pairwise comparisons indicated a statistically significant difference in the average 25-OH-D value among the pairs normal-moderate ( $p = 0.001$ ), normal-severe ( $p < 0.001$ ) and mild – severe ( $p = 0.002$ ) depressive symptoms in female participants. In male participants, a significant difference was observed between the pairs normal-mild ( $p = 0.002$ ) and normal-moderate ( $p < 0.001$ ).

Association between 25(OH)D & GDS-15 grouped by patients with/without CVD

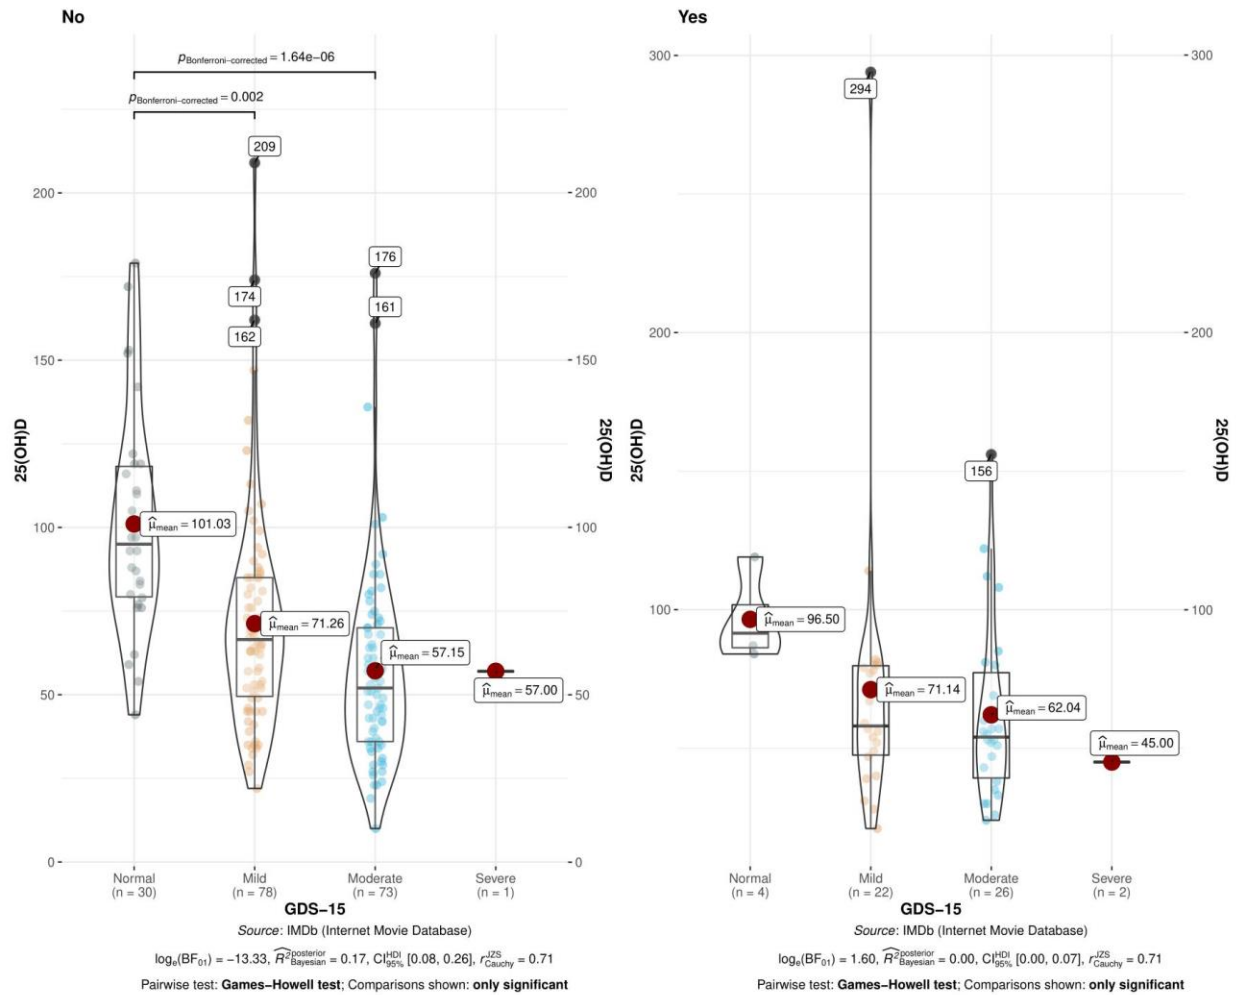

**Supplementary Figure S3.** Results of association between GDS-15 and 25(OH)D, grouped by CVD category. The finding shows significant association of GDS-15 with 25(OH)D, only for patients with no CVD. The Bonferroni pairwise test indicated significant differences in the average value of 25(OH)D among the pairs, normal-mild ( $p=0.002$ ) and normal-moderate ( $p=1.64 \times 10^{-6}$ ).

Association between GDS-15 & 25(OH)D grouped by Physical Activity (yes/no)

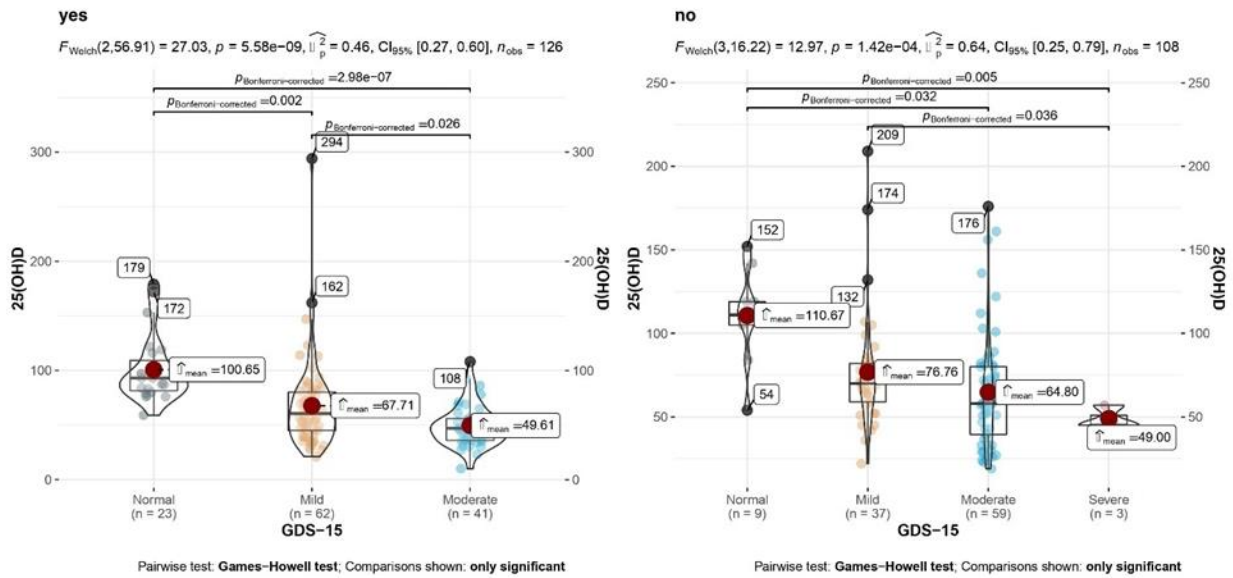

**Supplementary Figure S4.** Association between GDS-15 and 25(OH)D grouped by physical activity. The above finding shows significant association of GDS-15 with 25(OH)D for patients in the physical activity categories: Yes ( $F_{\text{Welch}}(2,56.91) = 27.03, p = 5.58e-09, E(\hat{\omega}_p^2) = 0.46, CI [0.27, 0.60]$ ) and No ( $F_{\text{Welch}}(3,16.22) = 12.97, p = 1.42e-04, \hat{\omega}_p^2 = 0.64, CI [0.25, 0.79]$ ). For patients in no physical activity category, the Bonferroni pairwise test indicated significant difference in the average value of 25(OH)D among the pairs, normal-mild ( $p = 0.002$ ), normal-moderate ( $p = 2.98e-07$ ), and mild-moderate ( $p = 0.026$ ). Meanwhile, for the patients in the Yes category, the Bonferroni pairwise test indicated significant differences in the average value of 25(OH)D among the pairs, normal-moderate ( $p = 0.032$ ), normal-severe ( $p = 0.005$ ), and mild-severe ( $p = 0.036$ ).

**Supplementary Table S1: Results of ordinal logistic regression for the association between Depression and 25(OH) D status after adjusting for other factors**

| Predictors                             | OR   | 95% CI       | p                 |
|----------------------------------------|------|--------------|-------------------|
| Gender [Male vs. Female]               | 0.34 | 0.14 – 0.79  | <b>0.01</b>       |
| Age                                    | 1.04 | 0.98 – 1.11  | 0.20              |
| Marital status [Married]               | Ref  |              |                   |
| Marital status [Divorced]              | 1.21 | 0.26 – 6.60  | 0.81              |
| Marital status [Single]                | 1.78 | 0.19 – 39.94 | 0.64              |
| Marital status [Widowed]               | 0.74 | 0.34 – 1.62  | 0.44              |
| Income [<1000 KD]                      | Ref  |              |                   |
| Income [1001-1500 KD]                  | 0.73 | 0.31 – 1.71  | 0.46              |
| Income [1501-2000 KD]                  | 1.16 | 0.43 – 3.17  | 0.77              |
| Income [More than 2000 KD]             | 1.09 | 0.36 – 3.38  | 0.88              |
| Vitamin D supplementation [Yes vs. No] | 1.06 | 0.36 – 3.28  | 0.91              |
| Sleep duration (hours/day)             | 0.75 | 0.57 – 0.97  | <b>0.032</b>      |
| Physical activity [Yes vs. No]         | 0.34 | 0.18 – 0.63  | <b>&lt; 0.001</b> |

|                                                        |       |              |                  |
|--------------------------------------------------------|-------|--------------|------------------|
| Dyslipidemia [Yes vs. No]                              | 1.53  | 0.74 – 3.15  | 0.25             |
| Hypertension [Yes vs. No]                              | 1.05  | 0.53 – 2.07  | 0.89             |
| Cardiovascular or cerebrovascular disease [Yes vs. No] | 1.94  | 0.98 – 3.91  | 0.062            |
| Sun exposure [hours/day]                               | 1.01  | 0.92 – 1.11  | 0.79             |
| PTH concentration                                      | 0.95  | 0.86 – 1.06  | 0.38             |
| Vitamin D: Deficiency                                  | Ref   |              |                  |
| Vitamin D: Insufficiency                               | 6.40  | 2.20 – 19.91 | <b>&lt;0.001</b> |
| Vitamin D: Sufficiency                                 | 19.70 | 5.60 – 74.86 | <b>&lt;0.001</b> |
| OR: Odds ratio, CI: Confidence interval                |       |              |                  |
